# Supplementary material for: Engineering stable and efficient ketol-acid reductoisomerases for industrial biotransformations using ancestral sequence reconstruction.
Source: Research Square preprint supplement (doi:10.21203/rs.3.rs-8177142/v1), 2025-12-03
Supplement: Supplementary file 1 [file e6ffe2f44ee0a06c2f7fee73.xlsx]

## Sheet: Contents
Table of Contents
S1	Characteristics of ancestral proteins selected in this study

## Sheet: S1
							NADH			NADPH
Protein ID	Ancestor/Extant	No. of extants under node	Organism	β2-αB loop	Cofactor preference	NADH/ NADPH ratio of kcat/KM	kcat	Km	kcat/Km	kcat	Km	kcat/Km	Sequence	Molecular weight (Da)
N1	Ancestor	608	NA	LRKGSKS	NADPH	0.389573	2.403	4.47	0.538	1.955	1.416	1.381	MAKIYYDKDADLDLLKGKTIAVIGYGSQGHAQAQNLRDSGVNVIVGLRKGSKSWERAKEDGLEVMTVAEAAKKADIIQILIPDEVQPEVYKEEIEPNLKEGNALGFSHGFNIHFGQIVPPENVDVFMVAPKGPGHLVRRMYQEGKGVPALIAVHQDYTGKAKEIALAYAKGIGCTRAGVIETTFKEETETDLFGEQAVLCGGVTELIKAGFETLVEAGYQPEIAYFECLHELKLIVDLIYEGGLSGMRYSVSDTAEYGDLTRGPRIINEETREEMKKILEEIQSGEFAREWILENQAGRPVFNALRKQEKEHPIEKVGKKLRAMMPWLKKKE	39884
N29	Ancestor	50	NA	ELPGSPN	NADH	2.4779	0.399	0.074	5.382	0.295	0.136	2.172	MAKIYYDKDADLNLLKGKTIAIIGYGSQGHAQAQNLRDSGVNVIVAELPGSPNWEQAKKDGFKPVSAAEAAKQADIIQILVPDEVQAKVYKKEIEPNLKPGKALVFSHGFNIHFGQIVPPKDVDVFMVAPKGPGHLVRRMYEEGKGVPCLIAVHQDASGKAKELALAYAKGIGGTRAGVIETTFKEETETDLFGEQAVLCGGVTELIKAGFETLVEAGYQPEIAYFECLHELKLIVDLIYEGGISGMRYSISDTAEYGDLTRGPRIITEETRKEMKKILSEIQSGEFAREWILENQAGRPVFNALRKKDKEHLIEKVGKKLRAMMPWLKK	39343
N79	Ancestor	11	NA	ELPGSPN	NADH	29.2949	0.455	0.004	128.048	0.7	0.16	4.371	MAKIYYDKDADLNLLKGKTIAIIGYGIQGRAQALNLRDSGLDVIVSELPGSPNWEQAKEDGFKPVSAAEAAKQADIIQILTQDHVQAKVYKNEIEPNLKKGNALVFSHGFNIHFGQIVPPENVDVFMVAPKGPGSLVRQMYEEGKGVPCLIAVHQDATGKAKQLALAYAKGIGGTRAGVIETTFKEETETDLFGEQAVLCGGVSELIKAGFETLVEAGYQPEIAYFECLHELKLIVDLIYEGGITGMRKRVSDTAEYGDLTRGPRIINEETRKEMKKILKEIQSGEFAREWILENQAGRPVFNALEKKDEEHPIEKVGKKLRAMMPWLKKE	39545
N95	Ancestor	514	NA	LRPGSKS	NADPH	1.05823	1.144	0.223	5.125	1.246	0.257	4.843	MAKIYYDKDADLNLLKGKTIAVIGYGSQGHAHALNLRDSGVNVIVGLRPGSKSWEKAKEDGFEVMTVAEAAKKADIIMILVPDEVQPEVYKEEIEPNLKPGKALAFAHGFNIHFGQIVPPKDVDVFMVAPKGPGHLVRRMYEEGKGVPCLIAVHQDATGKAKEIALAYAKGIGGTRAGVIETTFKEETETDLFGEQAVLCGGVTELIKAGFETLVEAGYQPEIAYFECLHELKLIVDLIYEGGISGMRYSISDTAEYGDLTRGPRIINEETRKEMKKILKEIQSGEFAREWILENQAGRPVFNALRKKEKEHPIEKVGKKLRAMMPWLKKKE	39729
N227	Ancestor	382	NA	LRPGSKS	NADPH	0.899126	0.93	0.17	5.455	1.382	0.228	6.067	MAKIYYDKDADLNLLKGKTIAVIGYGSQGHAHALNLRDSGVDVVVGLRPGSKSWEKAEEDGFEVMTVAEAAKKADIIMILVPDETQPEVYKEEIEPNLKPGKALAFAHGFNIHFGQIVPPPDVDVFMVAPKGPGHLVRRMYEEGKGVPCLIAVHQDATGKAKEIALAYAKGIGGTRAGVIETTFKEETETDLFGEQAVLCGGVTELIKAGFETLVEAGYQPEIAYFECLHELKLIVDLIYEGGISGMRYSISDTAEYGDLTRGPRIITEETRKEMKKILKEIQSGEFAREWILENQAGRPVFNAMRRREAEHPIEQVGKKLRSMMPWLKKKEEEEEARQDQEAR	41179
N459	Ancestor	150	NA	LREGSKS	NADPH	0.403872	2.113	0.128	16.482	2.438	0.06	40.81	MKIYYDQDADLNLLKGKKVAVIGYGSQGHAHALNLRDSGVDVVVGLRPGSKSWEKAEEAGLKVMTVAEAAKQADIIMILVPDETQAEVYEEEIAPNLKPGNALAFAHGFNIHFGQIEPPADVDVFMVAPKGPGHLVRRVYTEGSGVPCLIAVHQDASGKAKEIALAYAKGIGGTRAGVIETTFKEETETDLFGEQAVLCGGVTALIQAGFETLVEAGYQPEIAYFECLHELKLIVDLMYEGGLSRMRYSISNTAEYGDYTRGPRVITEETRKEMKKILKEIQSGTFAREWILENQAGQPNFKAMRRQQAEHPIEQVGKELRSMMPWIKKNKQEEEATE	40202
N608	Ancestor	108	NA	LRKGGKS	NADPH	0.373635	1.617	1.125	1.437	2.139	0.556	3.846	MAKIYYDKDADLDVLKGKTIAVIGYGSQGHAQAQNLRDSGLNVIVGLRKGGKSWERAKEDGLEVMTVAEAAKKADIIQILIPDEVQPEVYKEQIEPNLKEGNALGFSHGFNIHFGQIVPPENVDVFMVAPKGPGHLVRRMYQEGKGVPALIAVHQDYTGKAKEIALAYAKGIGCTRAGVIETTFKEETETDLFGEQAVLCGGVTELIKAGFETLVEAGYQPEIAYFECLHELKLIVDLIYEGGLSGMWNSVSDTAEYGGLTRGPRIINEETREEMKKILEEIQSGEFAREWILENQAGRPVFNALRKQEKEHPIEKVGKKLRAMMPWLKKKE	39776
N615	Ancestor	22	NA	VREDGKS	NADPH	0.163333	0.395	0.251	1.576	1.018	0.106	9.649	MVKIYHDKDVDLDVLKGKTIAVIGYGSQGRAQAQCMRDSGLNVIVGVREDGKSWKKAKEDGFKVMSIPEAAKKADIIHILIPDEVQPEVYEKQIKPNLKEGKTLSFSHGFNITYKQIVPPENVDVIMVAPKSPGAMERKTYLEGFGVPALIAVEQDATGKAKEIALAMAKAMGFTRAGVIETTFDEETTTDLFGEQAVLCGGVTELIKAGFETLVEAGYQPEIAYFECLHELKLIVDLIYEGGLEHMWDNVSNTAEYGGRTRGPRIINEETKKRMKKILKEIESGKFAKEWISEYKSGMPNLKKMREEESEHQIEVVGKEIRKLFEKPKKKE	40090
GsKARI	Extant	NA	Geobacillus stearothermophilus	LRKGKS	NADPH	0.29502	1.63	0.27	6.042	2.562	0.125	20.48	MAKVYYNGDANEQYLQGKTVAIIGYGSQGHAHAQNLRDSGVRVIVGLRKGKSWEQAEQDGFEVYSVREAAKQADIVMVLLPDEKQPAVYKEEIEPGLEPGNALVFAHGFNIHFSQIVPPEHVDVFLVAPKGPGHLVRRTYAEGAGVPALIAVYQDVTGHAKETALAYAKAIGAARAGVLETTFKEETETDLFGEQAVLCGGLTALIKAGFETLVEAGYQPEVAYFECLHEMKLIVDLLYEGGLSWMRYSISDTAQWGDFITGPRIINDAVKAEMKKVLDDIQTGKFAKSWILENQANRPEFNAINRRENEHLIEVVGRELRSMMPFVKAKQKEAVVPGAKH	37598
MrKARI_T84S	Extant (mutant)	NA	Meiothermus ruber	LRPGSRN	NADPH	0.0879628	1.733	0.357	4.861	2.363	0.043	55.262	MKIYYDQDADIGFIKDKTVAILGFGSQGHAHALNLRDSGIKVVVGLRPGSRNEEKARKAGLEVLPVGEAVRRADVVMILLPDETQGAVYKAEVEPNLKEGAALAFAHGFNIHFGQIKPRRDLDVWMVAPKGPGHLVRSEYEKGSGVPSLVAVYQDASGSAFPTALAYAKANGGTRAGTIATTFKDETETDLFGEQTVLCGGLTQLIAAGFETLVEAGYPPEMAYFECLHEVKLIVDLIYESGFAGMRYSISNTAEYGDYTRGPMVINREETKARMREVLRQIQQGEFAREWMLENVVGQPTLNANRNYWKDHPIEQVGPKLRAMMPFLKSRFTKEEVGS	37362
